# Supplementary material
Source: Springer Nature journal article supplement (https://www.springermedizin.de/resource/supplementary/12985_2007_361_MOESM2_ESM.pdf/9607818)

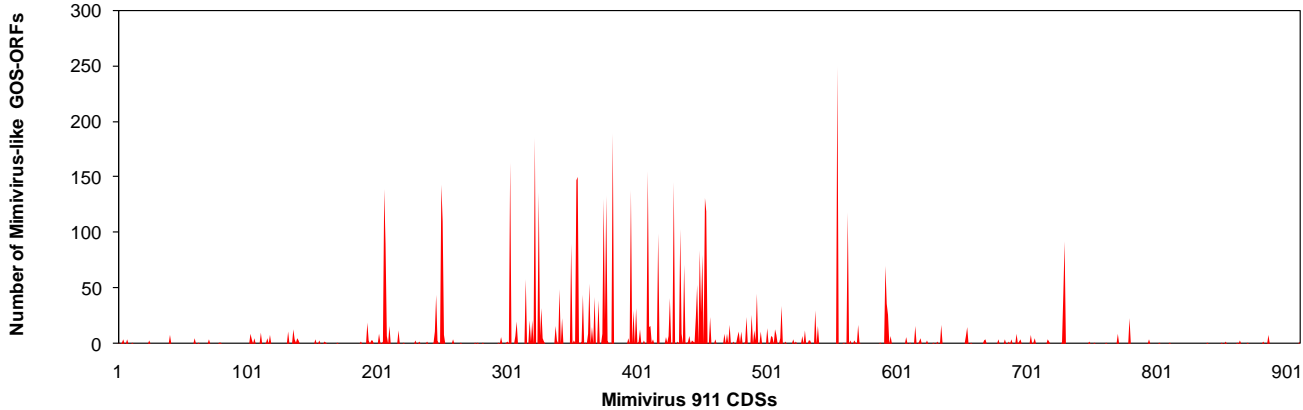

Supplement: MOESM2 [file 9607818]
